# Supplementary material
Source: PubMed Central journal article supplement (PMC2526711)
Supplement: E08-02-0160_1.pdf [file E08-02-0160_1.pdf]

## **E08-02-0160 Kaplan**

### **Supplementary Table 1. Tagged SNARE genes**

Listed are the SNARE genes tagged with either RFP or GFP (indicted) used in this study. All were expressed in all neurons under the SNB-1 promoter. SNARE homologue names were assigned based on highest BLAST identities to the mouse protein database. *C. elegans* cosmid/gene identifications are listed. Expected localization is based on homologous protein localization patterns. Abbreviations: IC – Intermediate Compartment, PM – Plasma Membrane, Endo – Endosomes, Lys – Lysosome and SV – Synaptic Vesicle.

### **Supplementary Table 2. Summary of *unc-18* point mutations tested.**

The listed *unc-18* transgenes were expressed in *unc-18(md299)* mutants. Point mutations expected to disrupt either the closed-Syntaxin binding (C) or the N-terminal binding (N) modes of UNC-18 are indicated, based on the cited prior publications. Transgenic animals were assayed for locomotion, aldicarb resistance, and accumulation of endogenous UNC-64 in cell bodies. Locomotion: (Unc) indicates Uncoordinated movement, (WT) indicates wild-type movement on NGM plates. The percentage of animals paralyzed after 140 minutes on 1mM aldicarb are indicated as follows: less than 20% (Resistant), 80-100% paralyzed (+++), 60-80% paralyzed (++) , and 20-60% paralyzed (+). Anti-UNC-64 cell body accumulation: (+++) indicates the *unc-18* mutant phenotype of UNC-64 accumulation, (WT) indicates a wild type UNC-64 distribution with little cell body staining.

**Supplementary Table 1. Tagged SNARE genes.**

| SNARE homologue   | <i>C. elegans</i> gene ID | Expected Localization | N-Terminal Tag |
|-------------------|---------------------------|-----------------------|----------------|
| Bet-1             | Y59E9AL.7                 | IC                    | GFP            |
| Sec-22            | F55A4.1                   | IC                    | RFP            |
| Membrin           | B0272.2                   | Golgi                 | RFP            |
| Gos-28            | F08F8.8                   | Golgi                 | GFP            |
| Ykt-6             | B0361.10                  | Golgi                 | RFP            |
| Vti-1             | Y57G11C.4                 | Golgi, Endo, SV       | GFP            |
| SNAP-23           | T14G12.2                  | PM                    | GFP            |
| SNAP-29           | K02D10.5                  | PM                    | GFP            |
| VAMP-3            | C30A5.5                   | Endo, PM              | GFP            |
| VAMP-3            | T14D7.3                   | Endo, PM              | GFP            |
| VAMP-3            | ZK795.4                   | Endo, PM              | GFP            |
| VAMP-7            | Y69A2AR.6                 | Endo, Lys             | GFP            |
| Endobrevin/VAMP-8 | B0513.9                   | Endo                  | GFP            |
| Snb-2             | F23H12.1                  | SV, PM                | GFP            |

**Supplemental Table 2. UNC-18 rescue experiments and point mutations tested.**

| UNC-18 constructs expressed in <i>unc-18(md299)</i> | Stx Binding mode | Locomotion | Aldicarb Res. | UNC-64 transport defect | Reference                                                                            |
|-----------------------------------------------------|------------------|------------|---------------|-------------------------|--------------------------------------------------------------------------------------|
| -                                                   | NA               | Unc        | Resistant     | +++                     |                                                                                      |
| wild-type                                           | NA               | WT         | +++           | WT                      |                                                                                      |
| W28S                                                | C                | WT         | +++           | WT                      | (Kauppi <i>et al.</i> , 2002)                                                        |
| D34N                                                | C                | WT         | +++           | WT                      | (Wu <i>et al.</i> , 1998; Ciufo <i>et al.</i> , 2005)                                |
| R39C                                                | C                | WT         | +++           | WT                      | (Harrison <i>et al.</i> , 1994; Wu <i>et al.</i> , 1998; Ciufo <i>et al.</i> , 2005) |
| S42F                                                | C                | WT         | +++           | WT                      | (Ehrhard <i>et al.</i> , 2000; Kauppi <i>et al.</i> , 2002)                          |
| E59K                                                | C                | WT         | +++           | WT                      | (Kauppi <i>et al.</i> , 2002)                                                        |
| D112N                                               | ND               | WT         | +++           | WT                      | (Ehrhard <i>et al.</i> , 2000)                                                       |
| L116K                                               | N                | WT         | +             | WT                      | (Peng and Gallwitz, 2004)                                                            |
| S311A, S313A                                        | ND               | WT         | +++           | WT                      | (Fujita <i>et al.</i> , 1996)                                                        |
| S311D, S313D                                        | ND               | WT         | +++           | WT                      | (Fujita <i>et al.</i> , 1996)                                                        |
| T574A                                               | ND               | WT         | +++           | WT                      | (Shuang <i>et al.</i> , 1998)                                                        |
| T574D                                               | ND               | WT         | ++            | WT                      | (Shuang <i>et al.</i> , 1998)                                                        |
| D34N, L116K                                         | C+N              | Unc        | Resistant     | +++                     |                                                                                      |
| R39C, L116K                                         | C+N              | Unc        | Resistant     | +++                     |                                                                                      |
| W28S, L116K                                         | C+N              | WT         | ND            | ND                      |                                                                                      |
| S42F, L116K                                         | C+N              | Unc        | Resistant     | +++                     |                                                                                      |

**References cited in E08-02-0160, Supplemental Table 2, McEwen and Kaplan:**

Ehrhard, K. N., Jacoby, J. J., Fu, X. Y., Jahn, R., and Dohlman, H. G. (2000). Use of G-protein fusions to monitor integral membrane protein-protein interactions in yeast. *Nat. Biotechnol.* *18*, 1075--1079.

Fujita, Y., Sasaki, T., Fukui, K., Kotani, H., Kimura, T., Hata, Y., Sudhof, T. C., Scheller, R. H., and Takai, Y. (1996). Phosphorylation of Munc-18/n-Sec1/rbSec1 by protein kinase C: its implication in regulating the interaction of Munc-18/n-Sec1/rbSec1 with syntaxin. *J. Biol. Chem.* *271*, 7265--7268.

Kauppi, M., Wohlfahrt, G., and Olkkonen, V. M. (2002). Analysis of the Munc18b-syntaxin binding interface. Use of a mutant Munc18b to dissect the functions of syntaxins 2 and 3. *J. Biol. Chem.* *277*, 43973--43979.

Shuang, R., Zhang, L., Fletcher, A., Groblewski, G. E., Pevsner, J., and Stuenkel, E. L. (1998). Regulation of Munc-18/syntaxin 1A interaction by cyclin-dependent kinase 5 in nerve endings. *J. Biol. Chem.* *273*, 4957--4966.
